# Supplementary material
Source: publisher site journal article supplement (https://www.dovepress.com/article/541485)
Supplement: Supplementary file 1 [file 541485%20Supplementary%20material.docx]

Supplementary material


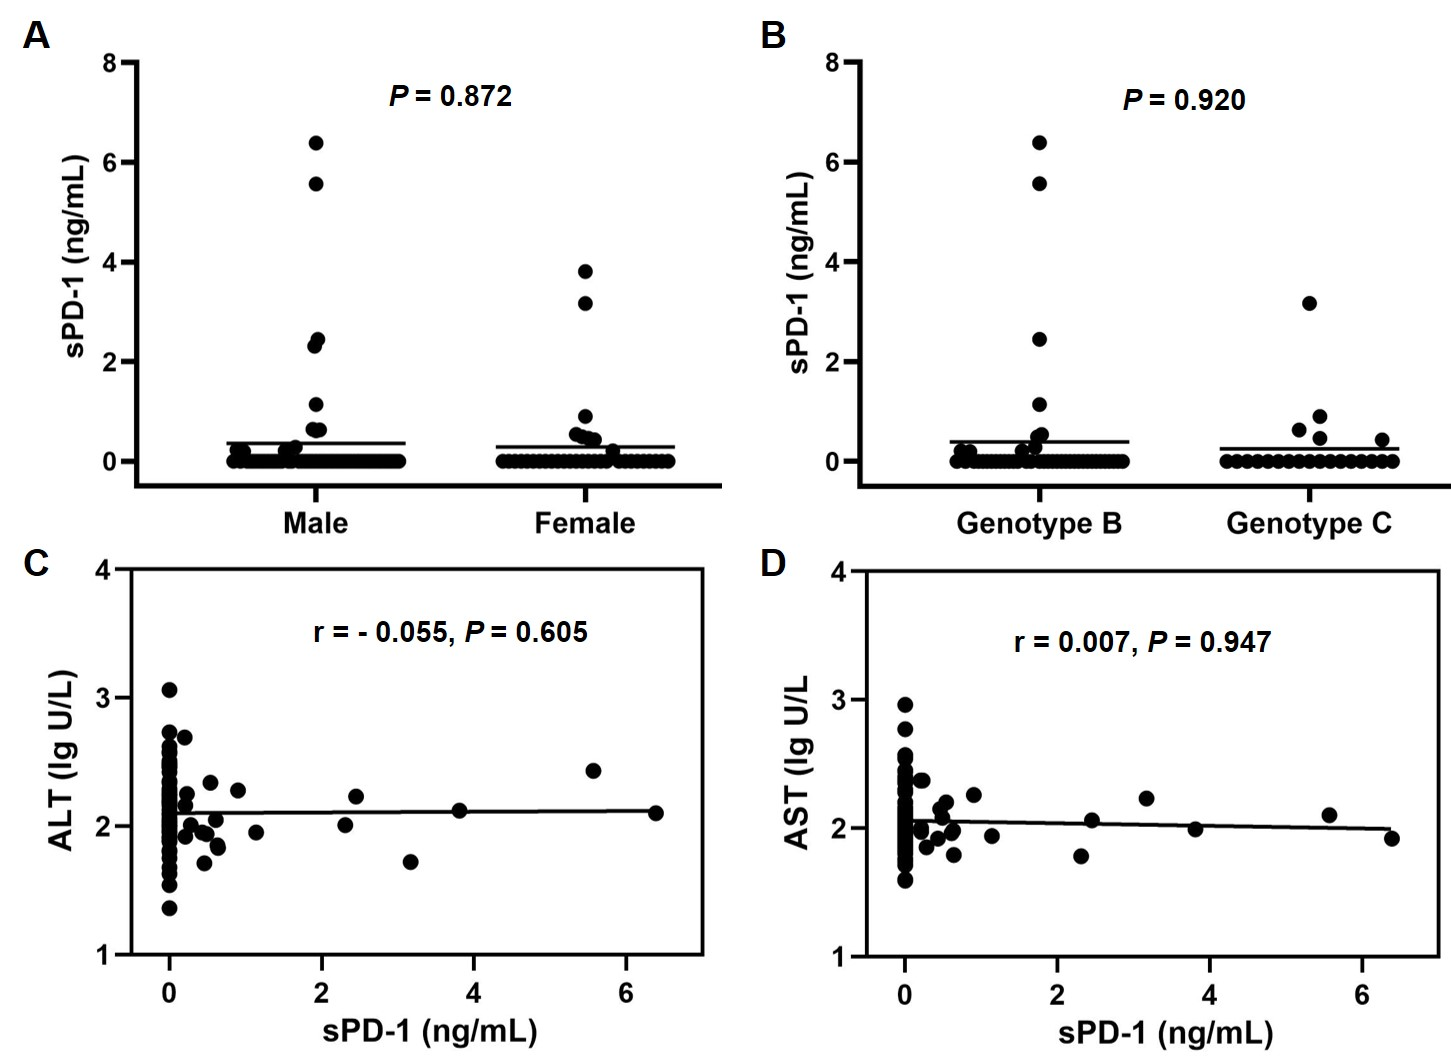


Figure S1 Correlations between baseline serum sPD-1 levels and (A) Sex, (B) Genotype, (C) ALT (lg U/L) and (D) AST (lg U/L). ALT, alanine aminotransferase; AST, aspartate aminotransferase; sPD-­1, soluble programmed cell death-­1.


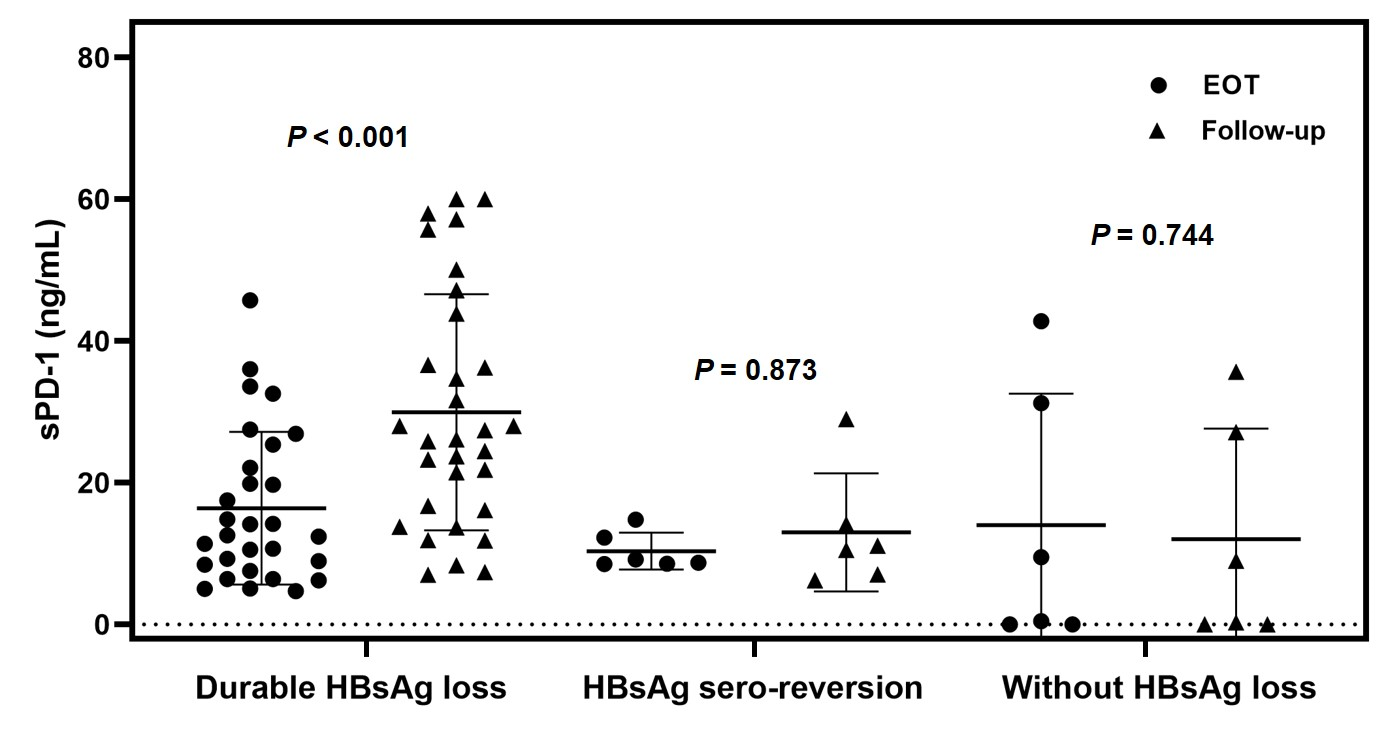


Figure S2 Comparisons of the sPD-1 levels at EOT and follow-up among the three groups (durable HBsAg loss group, HBsAg sero-reversion group and without HBsAg loss group). EOT, end of treatment; HBsAg, Hepatitis B surface antigen; sPD-­1, soluble programmed cell death-­1.


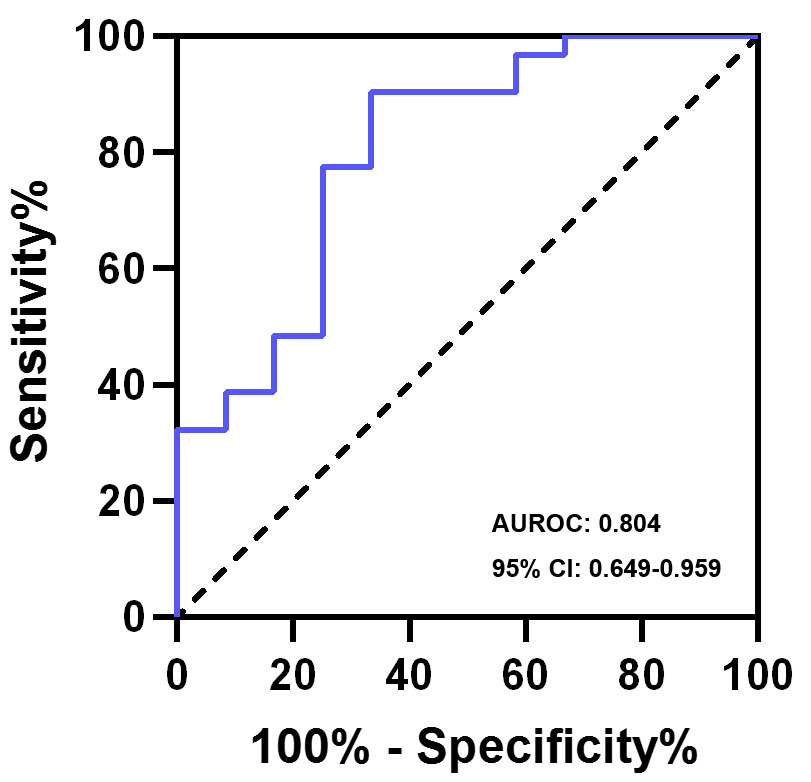


Figure S3 ROC curve for prediction of durable HBsAg loss assessed by sPD-1 levels at follow-up. sPD-1 achieved an AUROC of 0.804 (95% CI: 0.649-0.959), with a sensitivity of 90.3%, specificity of 66.7%, PPV of 87.5%, and NPV of 72.7%. AUROC, area under the receiver operating characteristic curve; CI, confidence interval; HBsAg, Hepatitis B surface antigen; PPV, positive predictive value; NPV, negative predictive value; ROC, the receiver operating characteristic; sPD-­1, soluble programmed cell death-­1.
